# Supplementary material for: Solid state emissive azo-Schiff base ligands and their Zn(ii) complexes: acidochromism and photoswitching behaviour
Source: Royal Society of Chemistry journal article supplement (doi:10.1039/d0nj03401k), 2020-11-03
Supplement: d0nj03401k1.pdf [file d0nj03401k1.pdf]

**Supporting Information**

**Solid state emissive azo-schiff base ligands and their Zn(II) complexes: acidochromism and photoswitching behaviour**

Yogesh Kumar, Vishwa Deepak Singh, Bhupendra Kumar Dwivedi, Nikhil Kumar Singh and Daya Shankar Pandey\*

Department of Chemistry, Institute of Science, Banaras Hindu University, Varanasi – 221 005 (U.P.), India

| <b>Contents:</b>                                                                                                                                         | <b>Page</b>    |
|----------------------------------------------------------------------------------------------------------------------------------------------------------|----------------|
| 1. <b>Fig. S1–S6</b> $^1\text{H}$ and $^{13}\text{C}$ NMR spectra of <b>1</b> , <b>L1</b> and <b>L2</b>                                                  | <b>S3–S8</b>   |
| 2. <b>Fig. S7–S10</b> $^1\text{H}$ and $^{13}\text{C}$ NMR spectra of <b>C1</b> and <b>C2</b>                                                            | <b>S9–S12</b>  |
| 3. <b>Fig. S11</b> ESI MS spectra of <b>L1</b> and <b>L2</b>                                                                                             | <b>S13</b>     |
| 4. <b>Fig. S12</b> ESI MS spectra of <b>C1</b> and <b>C2</b>                                                                                             | <b>S14</b>     |
| 5. <b>Fig. S13</b> showing Change in UV/vis absorption spectra of <b>L2</b> under in presence of<br>TFA and TEA                                          | <b>S15</b>     |
| 6. <b>Fig. S14</b> Solid–state emission spectrum of <b>L1</b> upon exposure to TFA and TEA                                                               | <b>S15</b>     |
| 7. <b>Fig. S15</b> Emission spectra of the ligands <b>L1</b> and <b>L2</b> in solution and solid                                                         | <b>S16</b>     |
| 8. <b>Fig. S16</b> Showing change in UV/vis absorption for <b>L1</b> and <b>L2</b> upon photoirradiation by<br>UV light of 365 nm                        | <b>S16</b>     |
| 9. <b>Fig. S17</b> Showing change in UV/vis absorption for <b>C1</b> and <b>C2</b> upon photoirradiation by<br>UV light of 365 nm                        | <b>S17</b>     |
| 10. <b>Fig. S18</b> $^1\text{H}$ NMR spectral changes in the aromatic region of <b>L2</b> (in $\text{CDCl}_3$ ) upon<br>irradiation by UV light (365 nm) | <b>S17</b>     |
| 11. <b>Fig. S19</b> $^1\text{H}$ NMR titration of <b>L1</b> by $\text{Zn}^{2+}$ (a) and <b>L2</b> (b)                                                    | <b>S18</b>     |
| 12. <b>Fig. S20–S22</b> IR spectra of <b>1</b> , <b>L1</b> , <b>L2</b> , <b>C1</b> and <b>C2</b>                                                         | <b>S19–S20</b> |
| 13. <b>Fig. S23–S24</b> UV/vis spectra of <b>C1</b> and <b>C2</b> obtained from TD-DFT calculations                                                      | <b>S21</b>     |
| 14. <b>Fig. S25</b> Frontier Molecular orbitals of <i>cis</i> - <b>C1</b> and <i>cis</i> - <b>C2</b>                                                     | <b>S22</b>     |
| 15. Tables                                                                                                                                               | <b>S23–S24</b> |

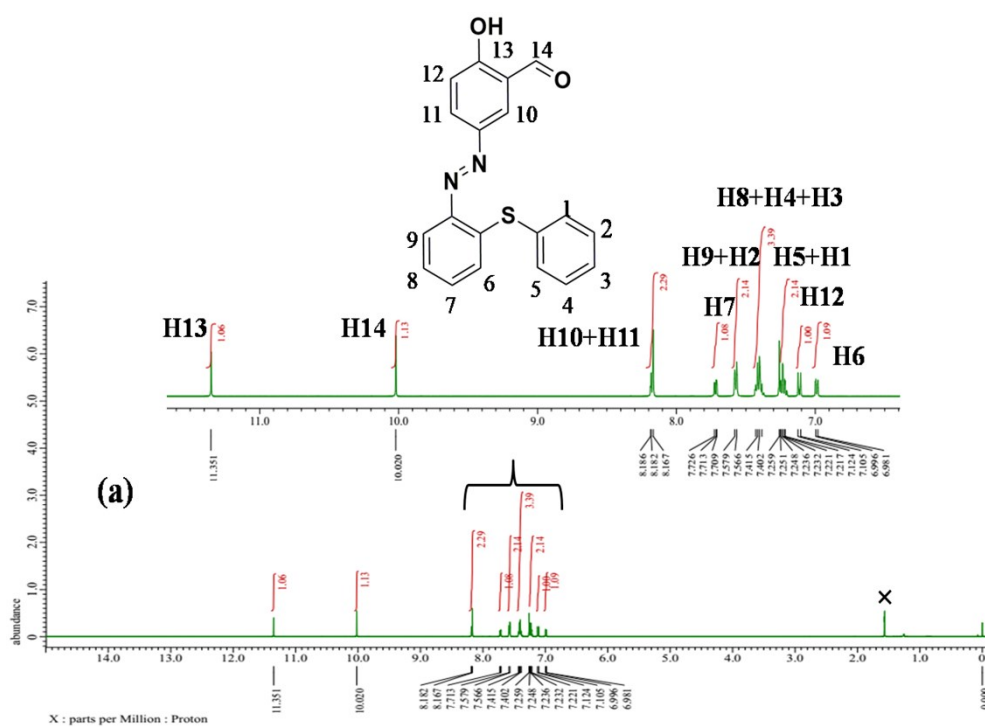

Fig. S1  $^1\text{H}$  NMR spectra of **1**.

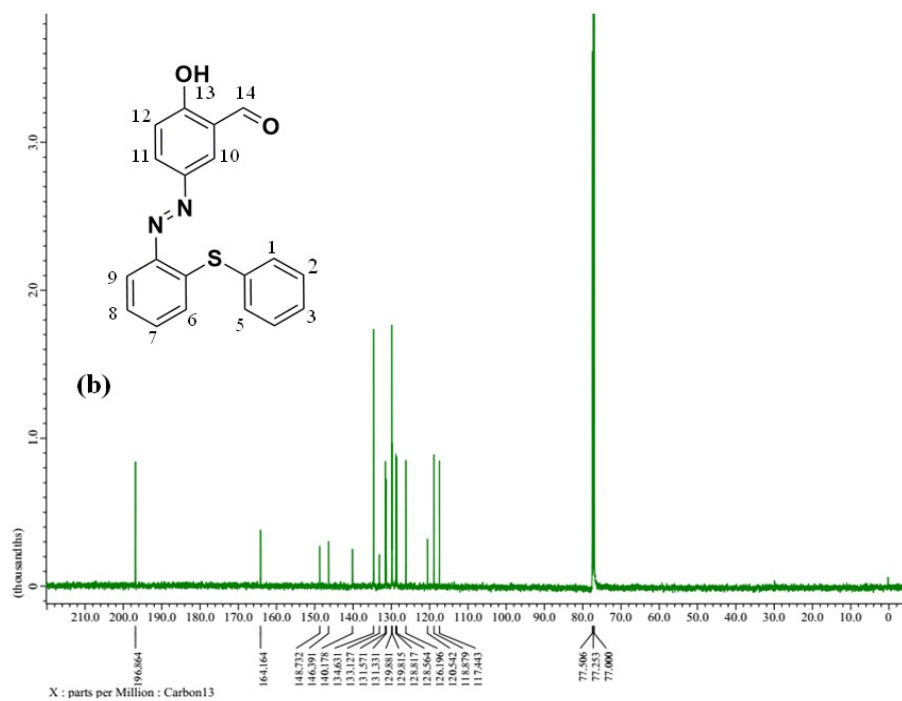

Fig. S2  $^{13}\text{C}$  (b) NMR spectra of 1.

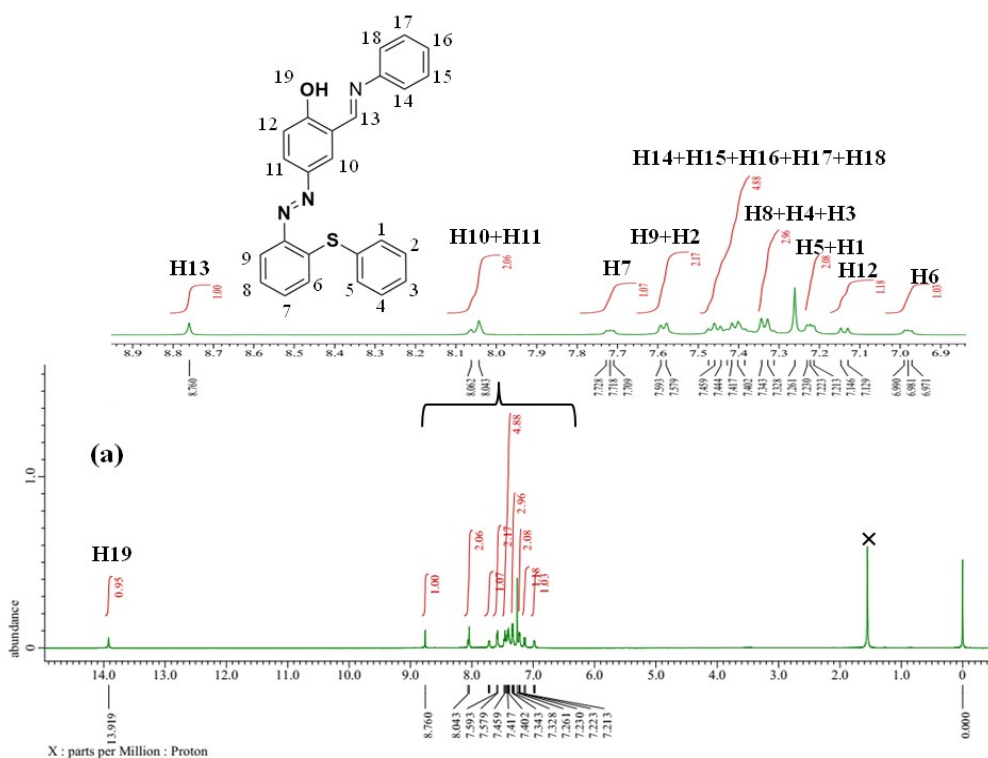

Fig. S3  $^1\text{H}$  NMR spectra of L1.

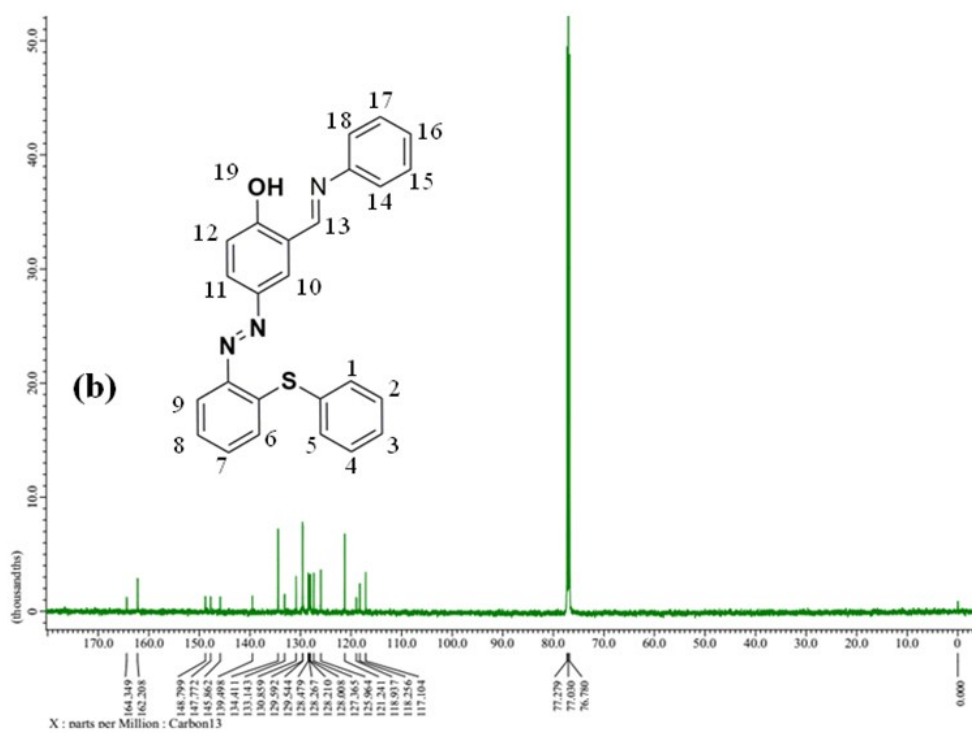

Fig. S4 <sup>13</sup>C (b) NMR spectra of L1.

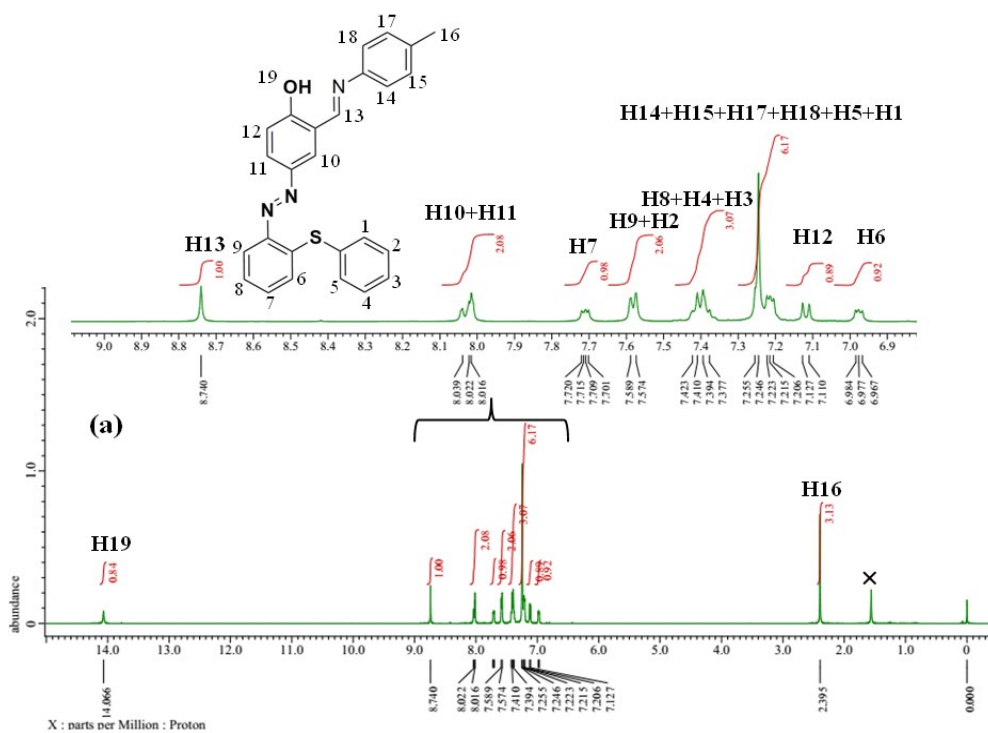

**Fig. S5**  $^1\text{H}$  (a) NMR spectra of L2.

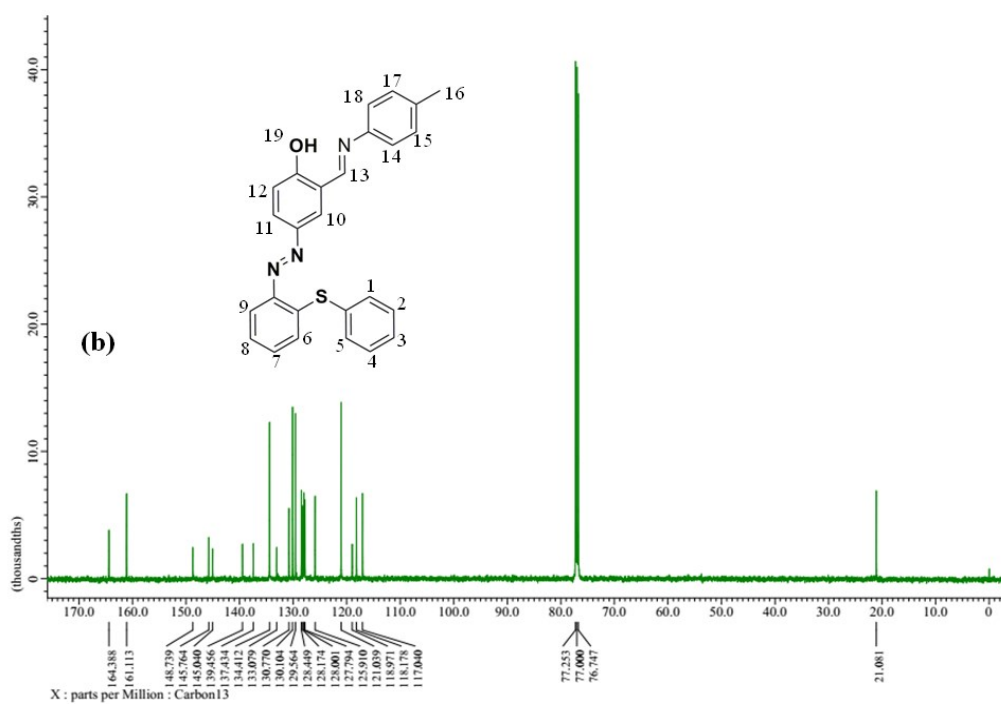

Fig. S6 <sup>13</sup>C (b) NMR spectra of L2



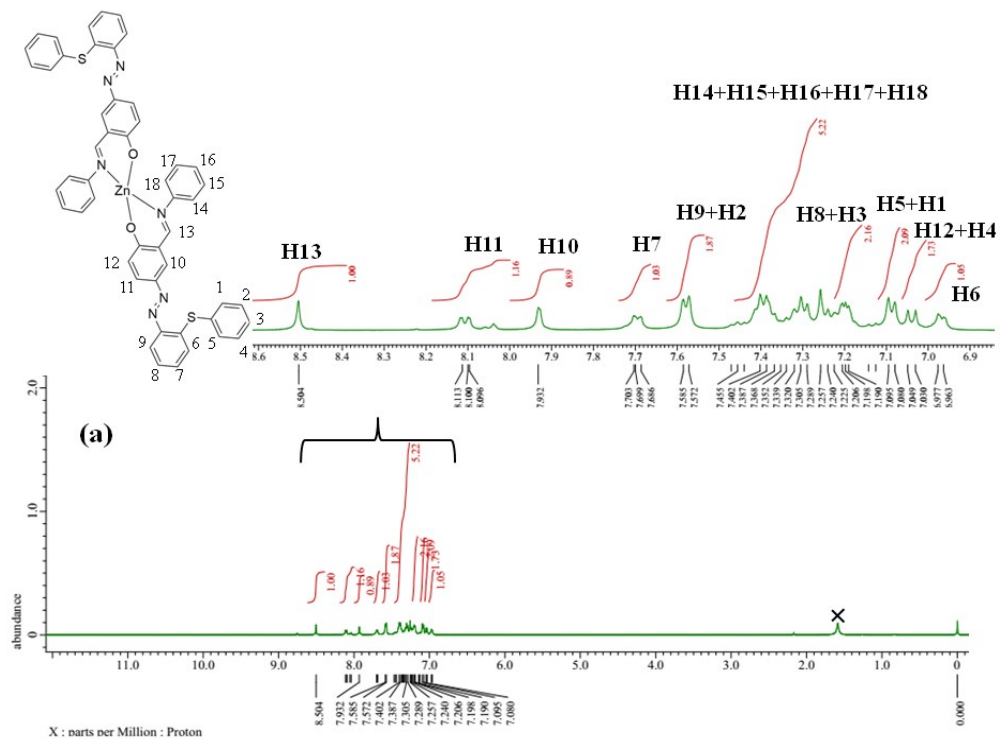

**Fig. S7**  $^1\text{H}$  (a) NMR spectra of C1

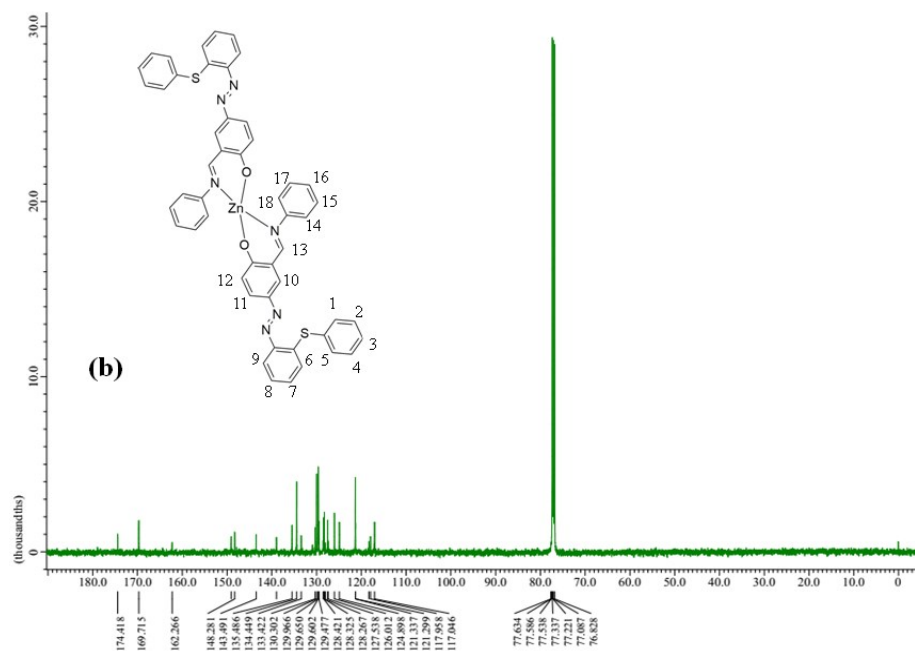

Fig. S8  $^{13}\text{C}$  (b) NMR spectra of C1

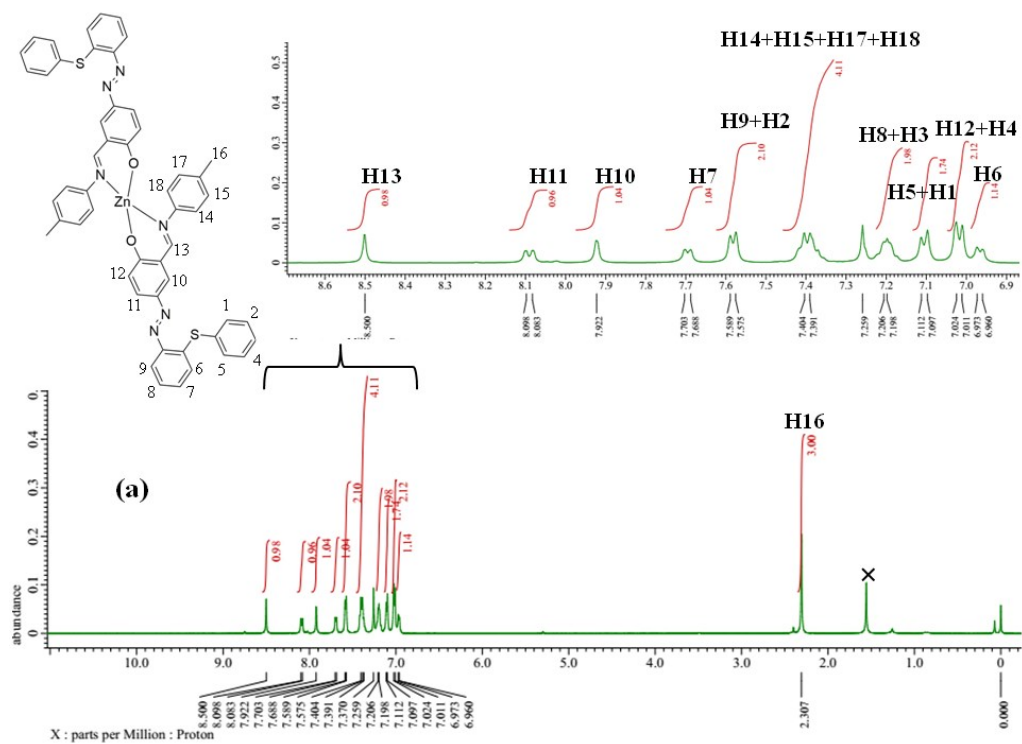

**Fig. S9**  $^1\text{H}$  (a) NMR spectra of C2

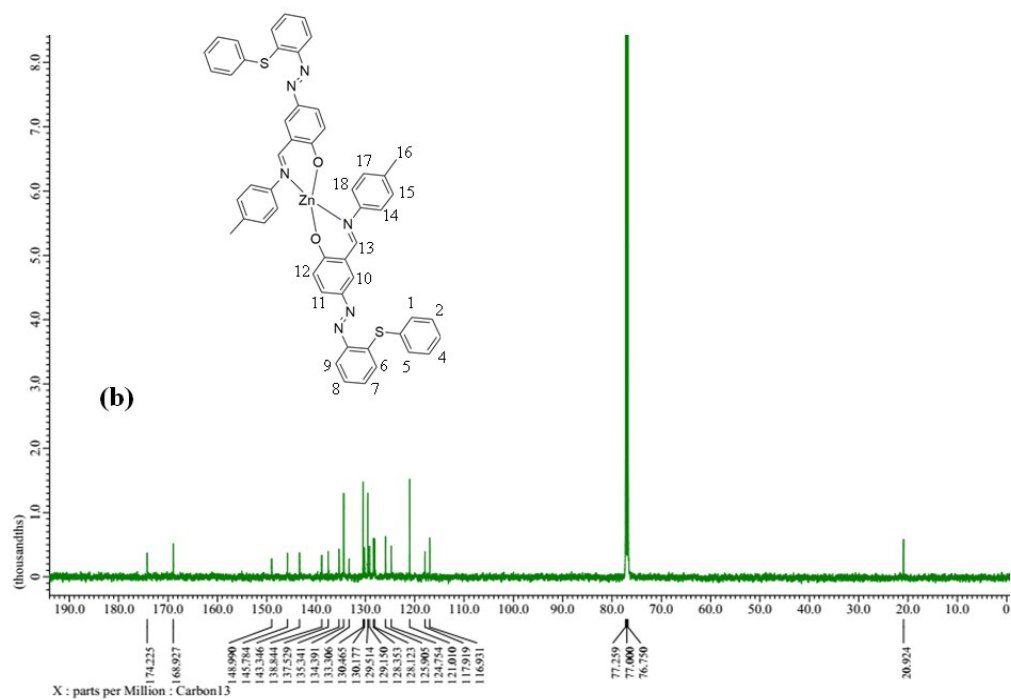

**Fig. S10**  $^{13}\text{C}$  (b) NMR spectra of C2

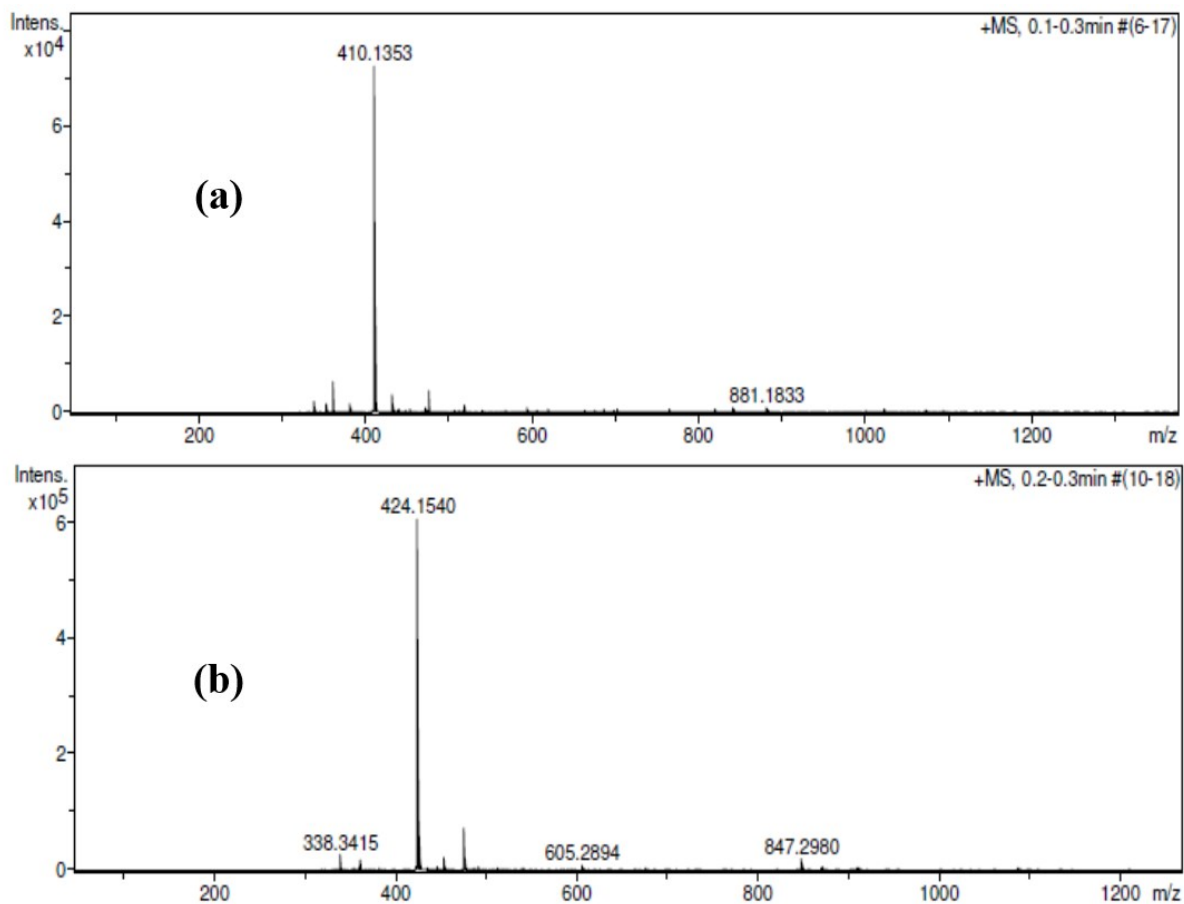

Fig. S11 ESI-MS spectra of L1 (a) and L2 (b).

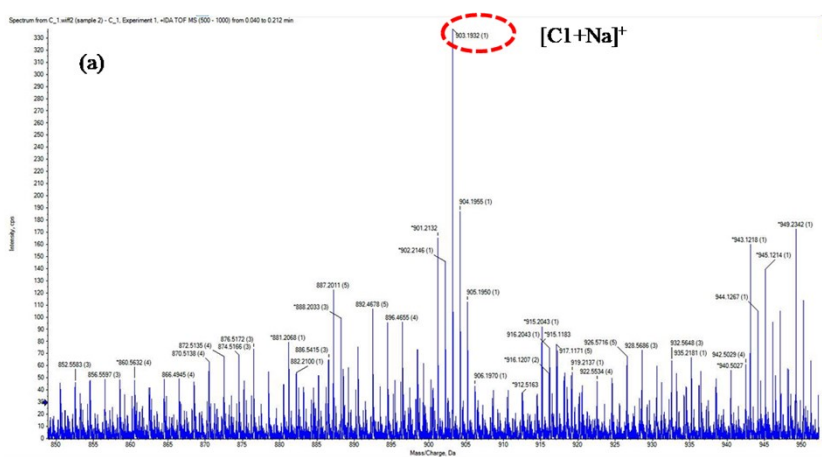

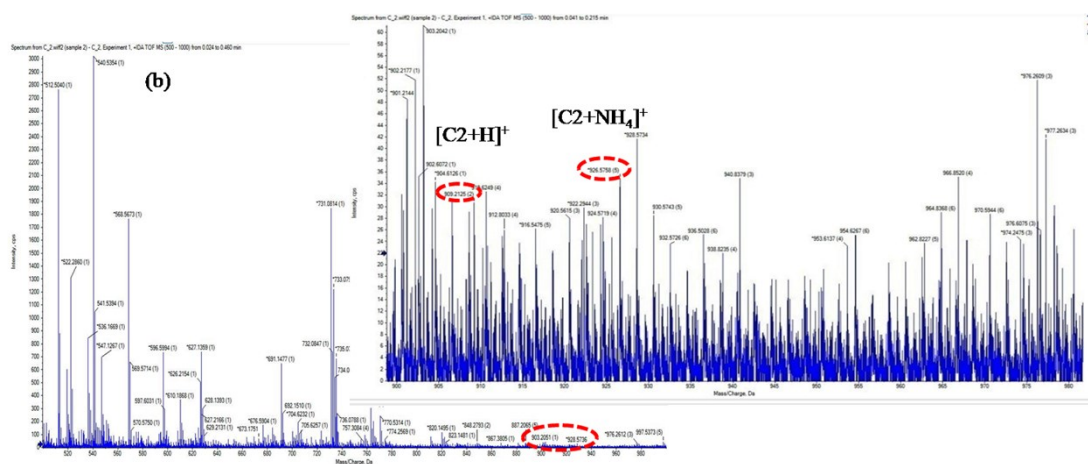

Fig. S12 ESI-MS spectra of C1 (a) and C2 (b).

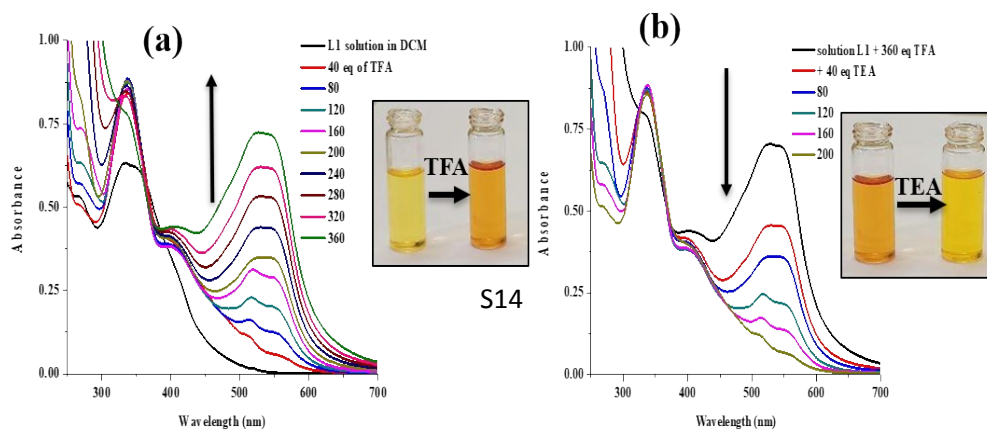

**Fig. S13** Change in UV/vis absorption spectra for the dichloromethane solution of **L2** under titration of (a) TFA and also (b) TEA

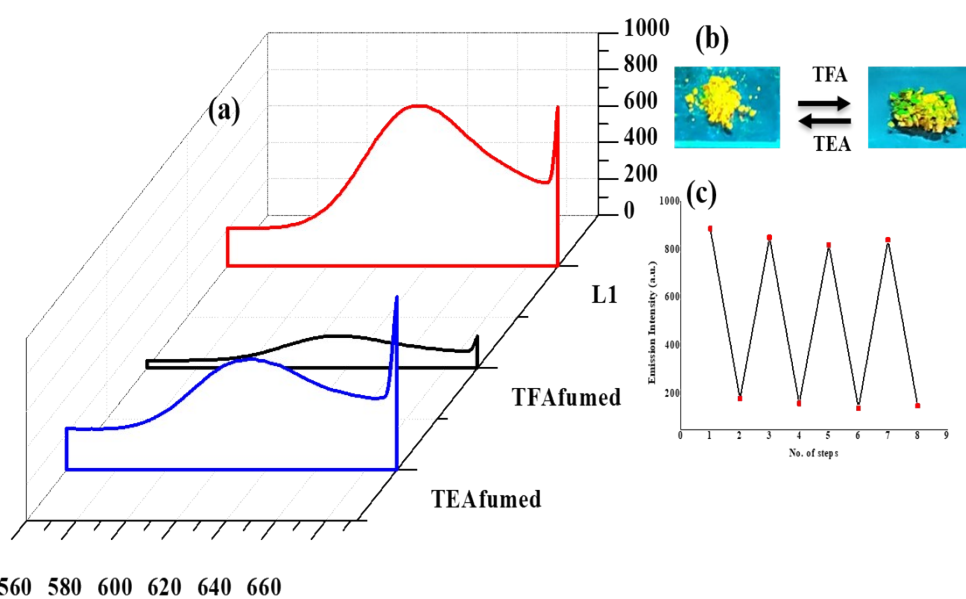

**Fig. S14** Change in solid-state emission spectrum of **L1** upon exposure to TFA fumes and regain the solid-state emission spectrum with exposure by TEA fumes (a), and photographs (b) emission switch cycle upon exposure to TFA and TEA(c).

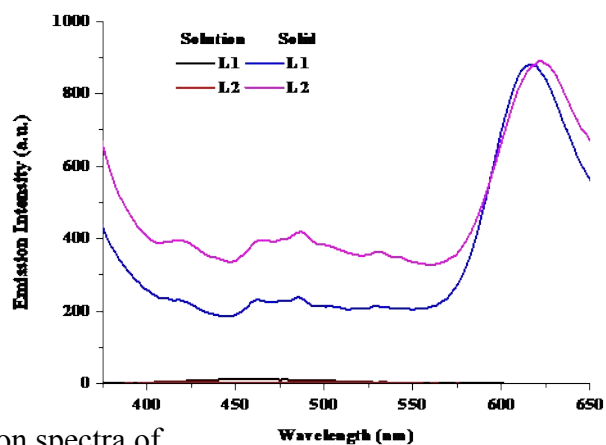

**Fig. S15** Emission spectra of the ligands L1 and L2 in solution and solid.

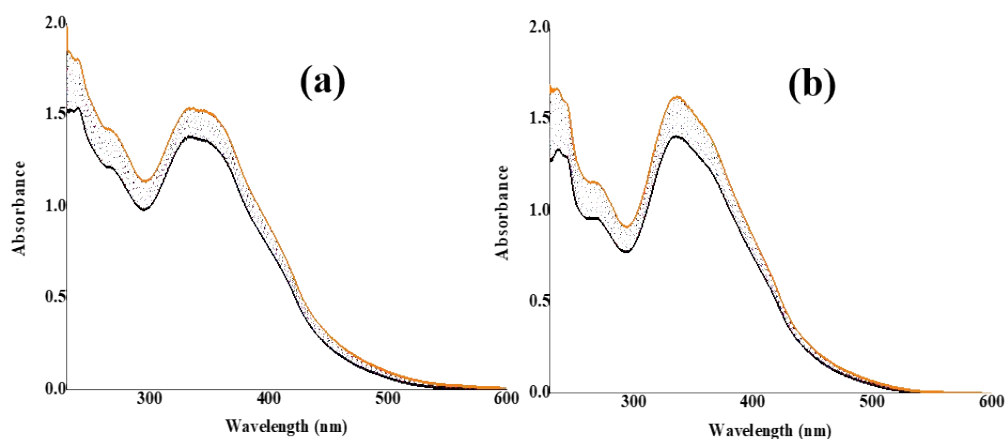

**Fig. S16**  
absorption

UV light  
(a) L1, (b)

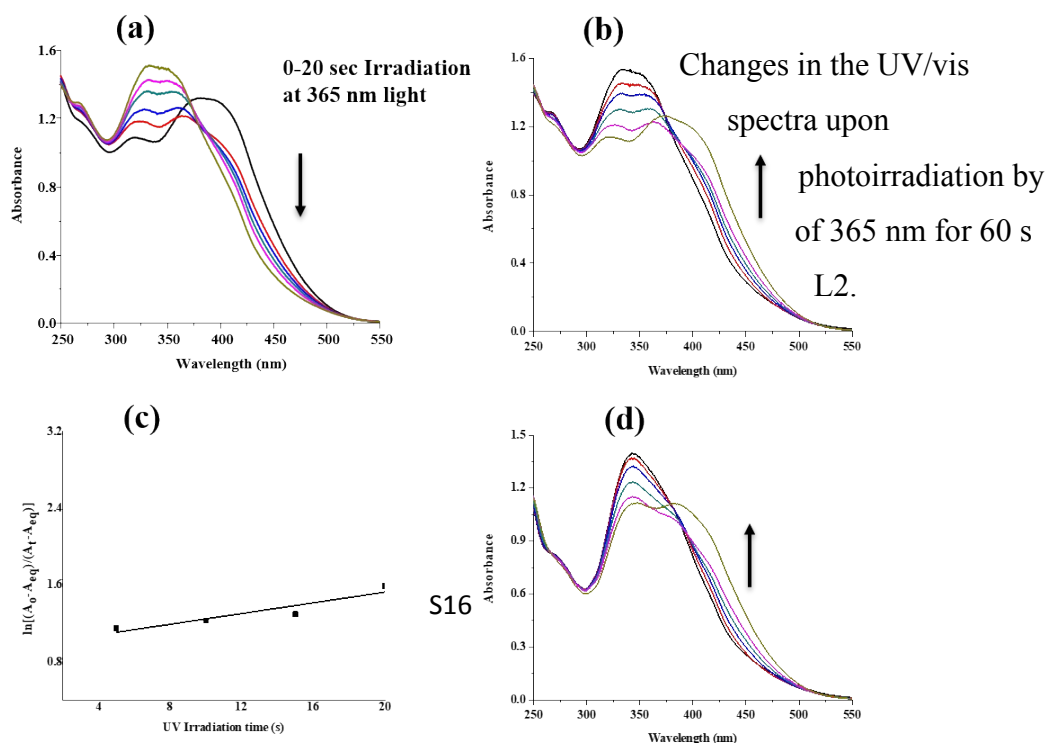

S16



**Fig. S17** Changes in the UV/vis absorption spectra upon photoirradiation by UV light of 365 nm for 20 s *trans* to *cis* (a), *cis* to *trans* (b), photoisomerization kinetics of the complex **C1**, UV/vis spectra obtained during UV ( $\lambda_{\text{max}}$ , 395 nm) (c), *cis* to *trans* for **C2** (d)

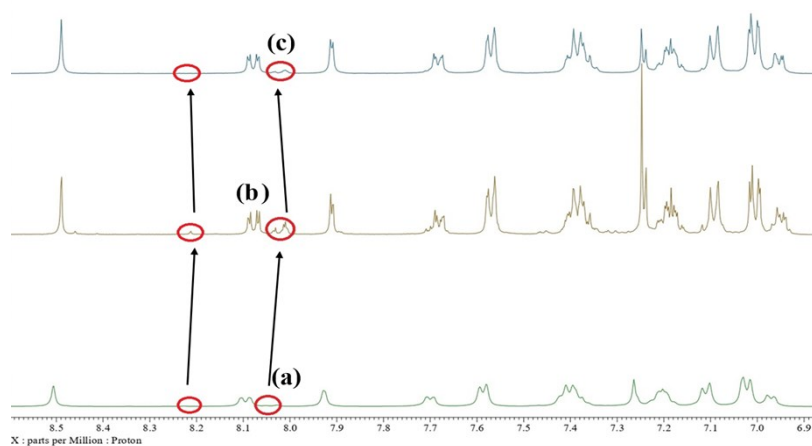

**Fig. S18** <sup>1</sup>H NMR spectral changes in the aromatic region of L2 in CDCl<sub>3</sub> upon irradiation with UV light (365 nm) (a) spectrum of *trans*-L2 before irradiation; (b) after irradiation for 15 s and (c) after keeping in the dark for 24 h.

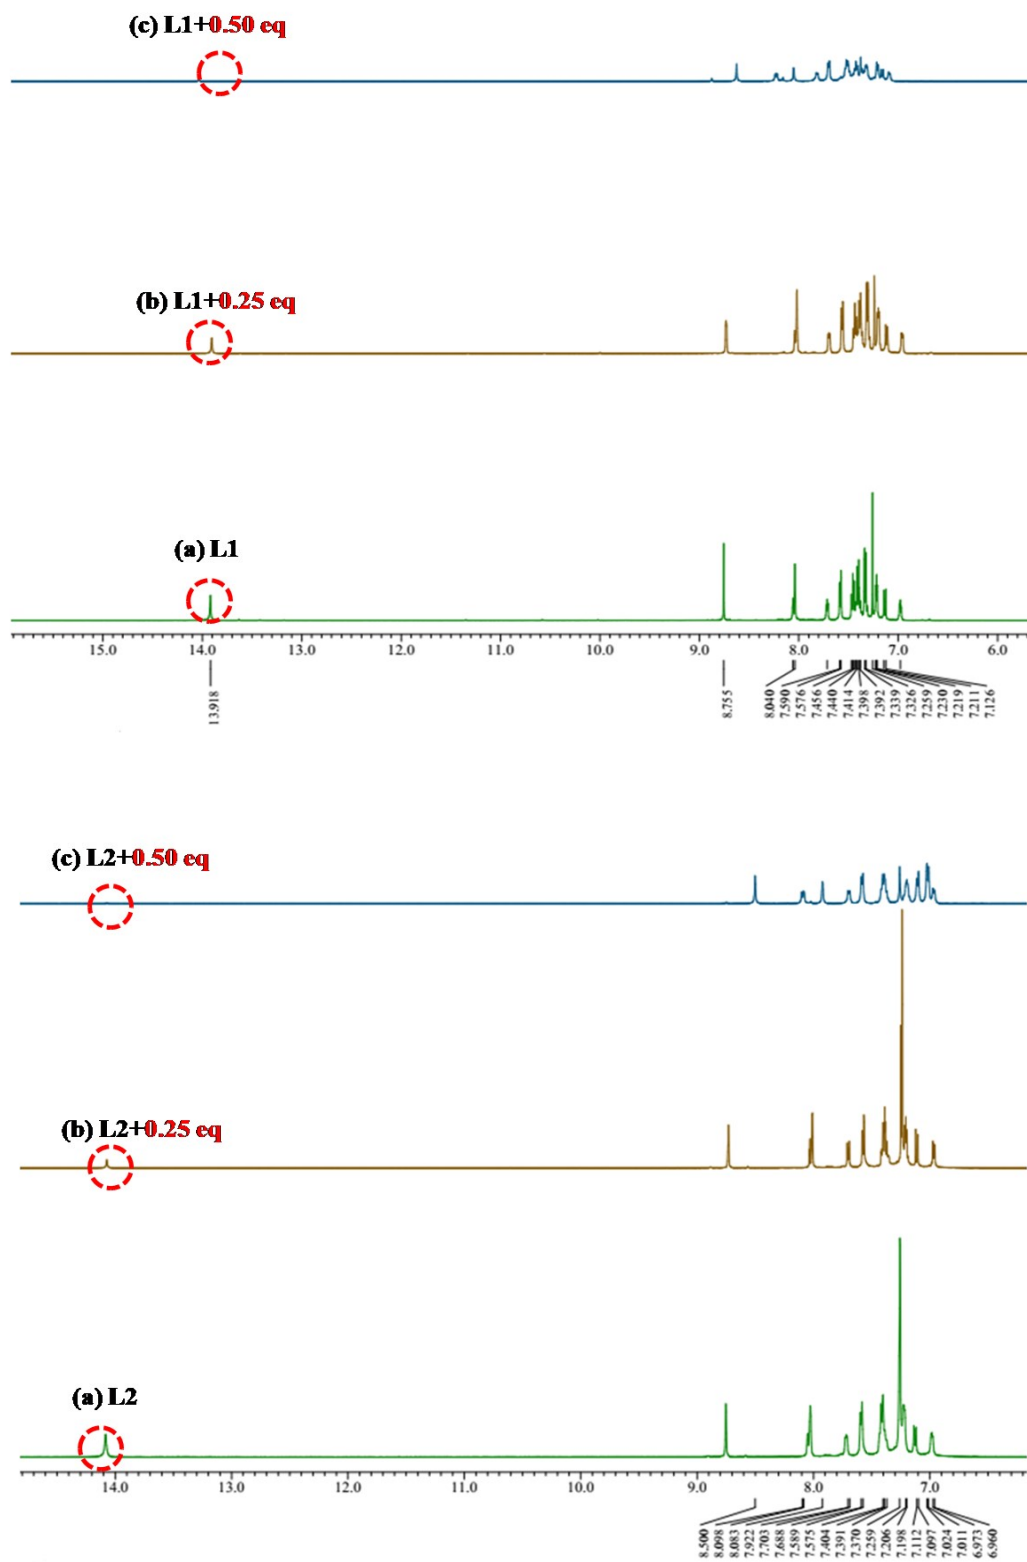

**Fig. 19**  $^1\text{H}$  NMR titration of L1 by  $\text{Zn}^{2+}$  (a) and L2 (b)

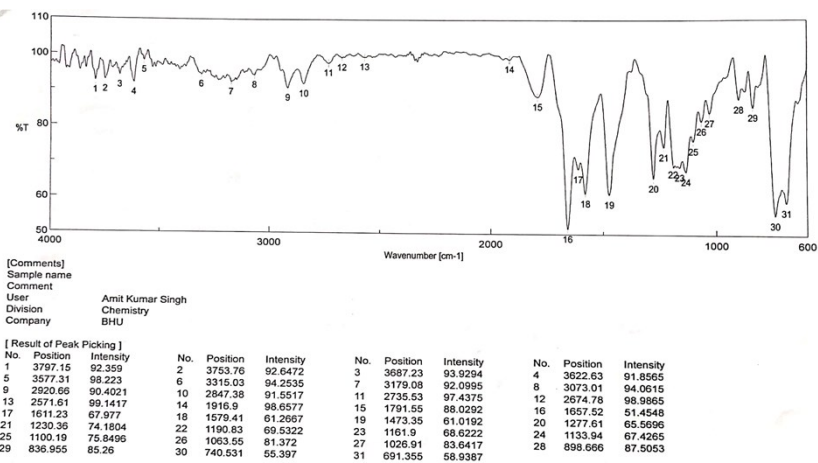

Fig. S20 IR spectrum of 1

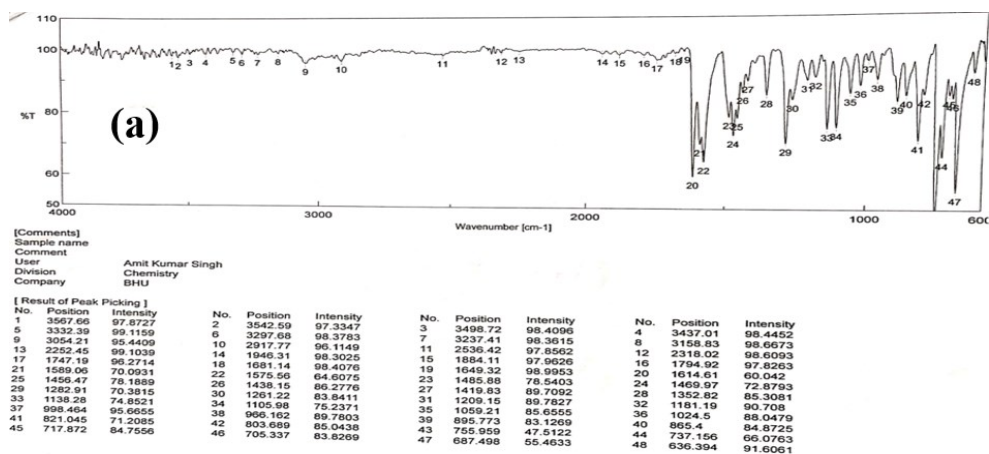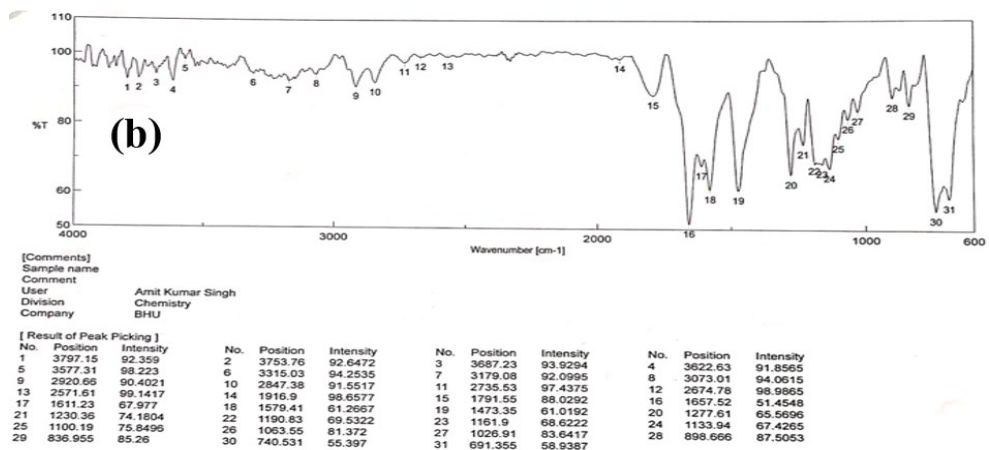

Fig. S21 IR spectra of L1 (a) and L2 (b)

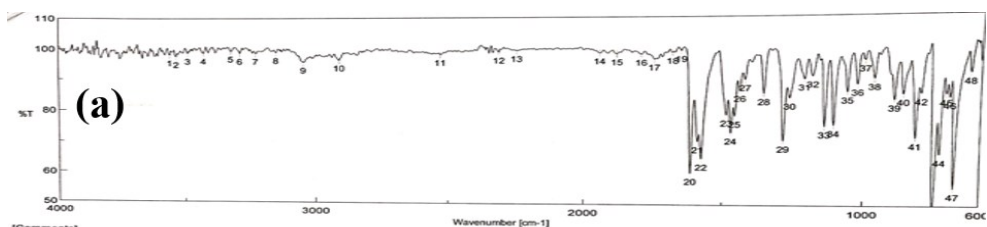

[Comments]  
Sample name  
Comment  
User  
Division  
Company

Amit Kumar Singh  
Chemistry  
BHU

[ Result of Peak Picking ]

| No. | Position | Intensity |
|-----|----------|-----------|-----|----------|-----------|-----|----------|-----------|-----|----------|-----------|
| 1   | 3567.66  | 97.6727   | 2   | 3542.59  | 97.3347   | 3   | 3498.72  | 98.4096   | 4   | 3437.01  | 98.4452   |
| 5   | 3332.39  | 99.1169   | 6   | 3297.68  | 98.3783   | 7   | 3237.41  | 98.3615   | 8   | 3158.63  | 98.6673   |
| 9   | 3054.21  | 95.4409   | 10  | 2917.77  | 96.1149   | 11  | 2536.42  | 97.8562   | 12  | 2318.02  | 98.6093   |
| 13  | 2252.45  | 99.1039   | 14  | 1946.31  | 98.3025   | 15  | 1884.11  | 97.9626   | 16  | 1794.92  | 97.8293   |
| 17  | 1747.19  | 96.2714   | 18  | 1691.14  | 98.4076   | 19  | 1649.32  | 98.9953   | 20  | 1614.61  | 60.042    |
| 21  | 1588.95  | 70.0931   | 22  | 1575.56  | 64.6075   | 23  | 1485.88  | 78.5403   | 24  | 1469.97  | 72.8793   |
| 25  | 1456.47  | 78.1889   | 26  | 1438.15  | 86.2776   | 27  | 1419.83  | 89.7092   | 28  | 1352.82  | 85.3081   |
| 29  | 1282.91  | 70.3815   | 30  | 1261.22  | 86.2776   | 31  | 1209.15  | 89.7827   | 32  | 1181.19  | 90.708    |
| 33  | 1138.28  | 74.8521   | 34  | 1105.98  | 75.2371   | 35  | 1059.21  | 85.6555   | 36  | 1024.5   | 88.0479   |
| 37  | 998.464  | 95.6655   | 38  | 966.162  | 89.7803   | 39  | 895.773  | 83.1269   | 40  | 865.4    | 84.8725   |
| 41  | 821.045  | 71.2085   | 42  | 803.689  | 85.0438   | 43  | 755.959  | 47.5122   | 44  | 737.156  | 66.0763   |
| 45  | 717.872  | 84.7566   | 46  | 705.337  | 83.8269   | 47  | 687.498  | 55.4633   | 48  | 636.384  | 91.6061   |

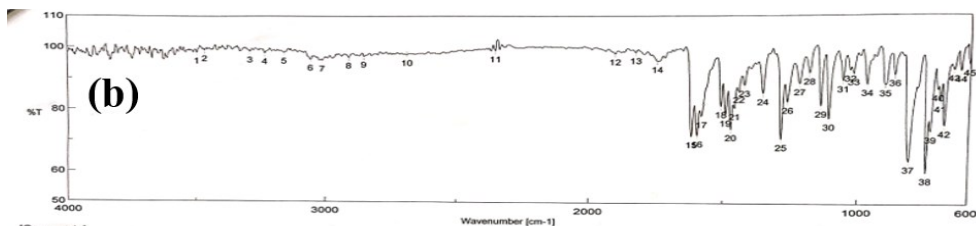

[Comments]  
Sample name  
Comment  
User  
Division  
Company

Amit Kumar Singh  
Chemistry  
BHU

[ Result of Peak Picking ]

| No. | Position | Intensity |
|-----|----------|-----------|-----|----------|-----------|-----|----------|-----------|-----|----------|-----------|
| 1   | 3500.17  | 98.0589   | 2   | 3470.28  | 98.7943   | 3   | 3296.71  | 96.4702   | 4   | 3239.34  | 98.0047   |
| 5   | 3166.06  | 98.1856   | 6   | 3054.33  | 95.9542   | 7   | 3019.53  | 95.6364   | 8   | 2916.32  | 96.6009   |
| 9   | 2858.95  | 96.8983   | 10  | 2692.62  | 97.3976   | 11  | 2357.07  | 98.5972   | 12  | 1904.84  | 97.7696   |
| 13  | 1826.74  | 98.1756   | 14  | 1746.23  | 95.3085   | 15  | 1617.02  | 71.3393   | 16  | 1595.81  | 71.5834   |
| 17  | 1579.9   | 77.7789   | 18  | 1507.58  | 95.3085   | 19  | 1490.22  | 78.276    | 20  | 1470.46  | 73.9545   |
| 21  | 1456.96  | 80.3348   | 22  | 1440.56  | 85.8079   | 23  | 1419.83  | 87.7263   | 24  | 1350.41  | 85.0398   |
| 25  | 1283.39  | 70.6406   | 26  | 1250.74  | 82.3371   | 27  | 1215.9   | 86.1584   | 28  | 1180.22  | 91.6746   |
| 29  | 1137.31  | 81.1399   | 30  | 1107.9   | 77.0172   | 31  | 1057.76  | 89.0549   | 32  | 1033.18  | 92.4577   |
| 33  | 1020.16  | 91.3262   | 34  | 970.619  | 87.897    | 35  | 904.451  | 87.7791   | 36  | 870.703  | 90.9804   |
| 37  | 816.259  | 63.5463   | 38  | 752.684  | 59.9065   | 39  | 738.603  | 72.9923   | 40  | 714.497  | 86.197    |
| 41  | 705.819  | 82.6802   | 42  | 686.945  | 74.8614   | 43  | 659.054  | 92.4184   | 44  | 633.019  | 92.1663   |
| 45  | 602.646  | 94.1399   |     |          |           |     |          |           |     |          |           |

Fig. S22 IR spectra of C1 (a) and C2 (b).

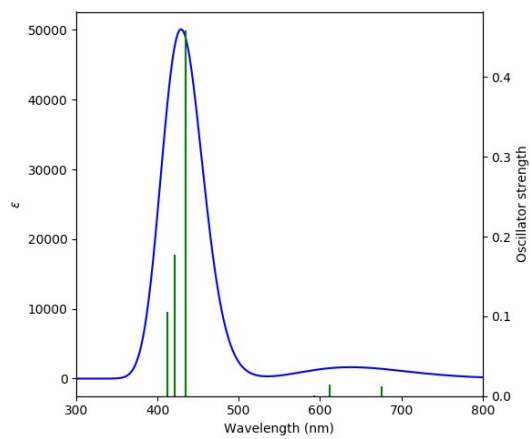

**Fig. S23** UV-vis spectra of **C1** obtained from TD-DFT calculations.

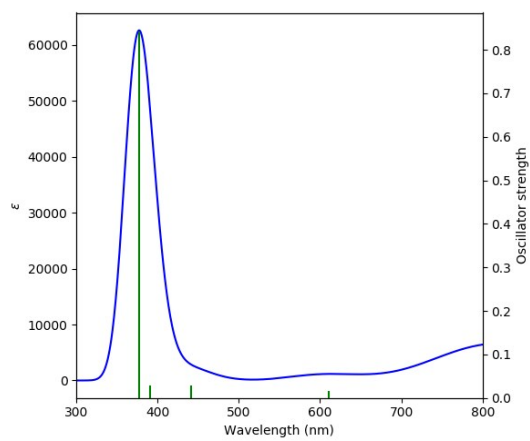

**Fig. S24** UV-vis spectra of **C2** obtained from TD-DFT calculations.

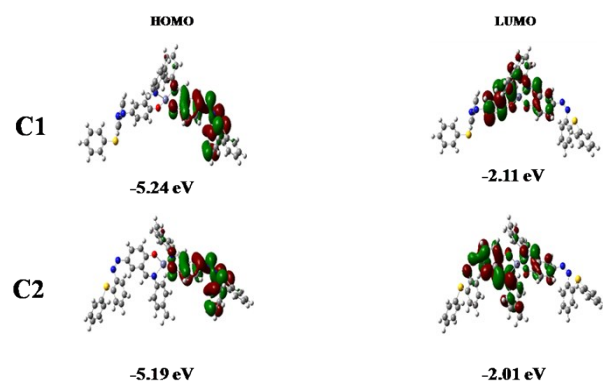

**Fig. S25** Frontier molecular orbitals of complexes *cis*-C1 and *cis*-C2 obtained from the DFT calculations.

**Table S1.** Selected crystallographic parameter for **C1** and **C2**

| <b>C1</b> | <b>Bond Length (Å)</b> | <b>C2</b> | <b>Bond Length (Å)</b> |
|-----------|------------------------|-----------|------------------------|
| Zn1 – O2  | 1.920(2)               | C6 – S1   | 1.771(3)               |
| Zn1 – O1  | 1.907(2)               | S1 – C8   | 1.780(3)               |
| Zn1 – N3  | 2.012(3)               | N3 – C13  | 1.425(3)               |
| Zn1 – N4  | 1.999(3)               | N2 – N1   | 1.266(3)               |
| S2 – C43  | 1.767(4)               | C16 – N2  | 1.419(3)               |
| S2 – C44  | 1.782(4)               | C19 – O1  | 1.302(3)               |
| S1 – C7   | 1.771(4)               | C22 – N3  | 1.306(3)               |
| O2 – C33  | 1.295(4)               | Zn1 – N3  | 1.996(2)               |
| O1 – C16  | 1.298(4)               | N3 – C26  | 1.418(3)               |
| N3 – C19  | 1.288(4)               | Zn1 – O1  | 1.918(2)               |
| N3 – C20  | 1.434(4)               | Zn1 – O2  | 1.918(2)               |
| N4 – C31  | 1.294(4)               | Zn1 – N4  | 2.007(2)               |
| N2 – N1   | 1.275(4)               | O2 – C34  | 1.307(3)               |
| N2 – C13  | 1.410(4)               | C37 – N5  | 1.422(3)               |
| N5 – N6   | 1.244(4)               | C40 – N4  | 1.298(3)               |
| N6 – C38  | 1.434(4)               | N4 – C42  | 1.431(3)               |
| N5 – C36  | 1.421(4)               | N5 – N6   | 1.249(3)               |
| N1 – C12  | 1.426(4)               | N6 – C51  | 1.514(4)               |

| <b>C1</b> | <b>Bond Angle (°)</b> | <b>C2</b>  | <b>Bond Angle (°)</b> |
|-----------|-----------------------|------------|-----------------------|
| O1 Zn1 O2 | 111.47(1)             | C8 S1 C6   | 101.57(1)             |
| N3 Zn1 O2 | 125.55(1)             | N2 N1 C13  | 114.1(2)              |
| N3 Zn1 O1 | 95.95(1)              | N1 C13 C8  | 115.7(2)              |
| N4 Zn1 O2 | 97.66(1)              | N1 C13 C12 | 124.6(2)              |

|            |           |            |            |
|------------|-----------|------------|------------|
| N4 Zn1 O1  | 128.00(1) | C16 N2 N1  | 113.3(2)   |
| N4 Zn1 N3  | 103.46(1) | O1 C19 C18 | 118.8(2)   |
| C44 S2 C43 | 104.24(1) | O1 C19 C20 | 123.7(2)   |
| C33 O2 Zn1 | 124.3(2)  | Zn1 N3 C22 | 119.86(2)  |
| C19 N3 Zn1 | 121.8(2)  | C26 N3 C22 | 119.8(2)   |
| C20 N3 Zn1 | 119.0(2)  | C26 N3 Zn1 | 120.04(2)  |
| C20 N3 C19 | 118.9(5)  | Zn1 O1 C19 | 125.43(17) |
| C31 N4 Zn1 | 121.0(2)  | O1 Zn1 N3  | 97.20(8)   |
| C25 N4 Zn1 | 121.0(2)  | O2 Zn1 N3  | 123.48(8)  |
| C25 N4 C31 | 118.8(3)  | O2 Zn1 O1  | 111.18(9)  |
| C13 N2 N1  | 114.7(3)  | N4 Zn1 N3  | 111.52(9)  |
| C38 N6 N5  | 112.1(3)  | N4 Zn1 O1  | 118.95(8)  |
| C36 N5 N6  | 115.4(3)  | N4 Zn1 O2  | 96.23(8)   |
| C12 N1 N2  | 112.5(3)  | C40 N4 Zn1 | 119.88(2)  |
| C17 C16 O1 | 117.8(3)  | C42 N4 Zn1 | 120.84(1)  |
